# Supplementary material for: Molecular regulation of vessel maturation
Source: Springer Nature journal article supplement (doi:10.1038/nm0603-685), 2003-05-30
Supplement: 41591_2003_BFnm0603685_MOESM1_ESM.pdf [file 41591_2003_BFnm0603685_MOESM1_ESM.pdf]

**Supplementary Table 1. Lessons from Knock-out and Knock-in Mice**

**Ligand/Receptor/Pathway**

| Gene                                     | Survival          | Phenotype                                                             |                                    |                                                                                        |                               | Ref. |
|------------------------------------------|-------------------|-----------------------------------------------------------------------|------------------------------------|----------------------------------------------------------------------------------------|-------------------------------|------|
|                                          |                   | Vasculogenesis                                                        | Angiogenesis                       | Vessel maturation                                                                      | Other                         |      |
| <i>Vegf-A</i>                            | E10.5             | Abnormal differentiation of blood island                              | Impaired angiogenesis              | Impaired lumen formation<br>Impaired special vessel organization                       |                               | .2   |
| <i>Vegf-B</i>                            | Alive             |                                                                       |                                    |                                                                                        | Atrial conduction abnormality | .4   |
| <i>Vegf120/188</i><br><i>Vegf120/164</i> | Alive<br>Alive    |                                                                       |                                    | Impaired arterial development                                                          |                               |      |
| <i>Vegf164/188</i>                       | Death postnatally |                                                                       | Impaired myocardial angiogenesis   | Ischemic cardiomyopathy                                                                |                               |      |
| <i>Pgf</i>                               | Alive             |                                                                       | Impaired pathological angiogenesis |                                                                                        |                               |      |
| <i>VegfR-1</i>                           | E8.5              | Disorganized EC                                                       |                                    |                                                                                        |                               |      |
| <i>VegfR-2</i>                           | E8.5-9.5          | Absent yolk sac blood island<br>Reduced hematopoietic precursors      |                                    |                                                                                        |                               |      |
| <i>VegfR-3</i>                           | E9.5              |                                                                       |                                    | Enlarged vessel lumens<br>Cardiovascular failure                                       |                               | 0    |
| <i>Nrp1</i>                              | Alive             | Impaired neural vascularization<br>Disorder yolk sac vascular network |                                    | Agensis and transposition of the great vessels<br>Persistent <i>truncus arteriosus</i> |                               | 1,12 |

| Gene             | Survival               | Phenotype                                                                 |                                                                                                      |                                                                 |                                                                                         | Ref. |
|------------------|------------------------|---------------------------------------------------------------------------|------------------------------------------------------------------------------------------------------|-----------------------------------------------------------------|-----------------------------------------------------------------------------------------|------|
|                  |                        | Vasculogenesis                                                            | Angiogenesis                                                                                         | Vessel maturation                                               | Other                                                                                   |      |
|                  |                        | Impaired vascular sprouting at the central nervous system and pericardium |                                                                                                      |                                                                 |                                                                                         |      |
| <i>Nrp1/2</i>    | E8.5                   | Avascular yolk sac                                                        |                                                                                                      |                                                                 |                                                                                         | 3    |
| <i>Nrp2</i>      | Alive                  |                                                                           |                                                                                                      | Reduction of small lymphatic vessels and capillaries            |                                                                                         | 4    |
| <i>Jagged1</i>   | E10                    |                                                                           |                                                                                                      | defects in remodeling of the embryonic and yolk sac vasculature |                                                                                         | 5    |
| <i>Notch1/4</i>  |                        |                                                                           |                                                                                                      | Defect of angiogenic vascular remodeling                        |                                                                                         | 6    |
| <i>EphB2 / 3</i> | E11.5                  | Defects in the remodeling of embryonic vascular network                   |                                                                                                      | Defects in the remodeling of embryonic vascular network         |                                                                                         | 7    |
| <i>Ephrin-B2</i> | E9.5                   |                                                                           | Defects in angiogenesis by both arteries and veins in the capillary network of the head and yolk sac | Defect of myocardial trabeculation                              |                                                                                         | 7-19 |
| <i>Pdgf-A</i>    | E10 or postnatal death |                                                                           |                                                                                                      |                                                                 | Loss of alveolar myofibroblasts<br>Reduced number of oligodendrocytes<br>Dysmyelination | 0,21 |

| Gene                             | Survival           | Phenotype                                                            |                                                                                |                                                     |                                                              | Ref. |
|----------------------------------|--------------------|----------------------------------------------------------------------|--------------------------------------------------------------------------------|-----------------------------------------------------|--------------------------------------------------------------|------|
|                                  |                    | Vasculogenesis                                                       | Angiogenesis                                                                   | Vessel maturation                                   | Other                                                        |      |
|                                  |                    |                                                                      |                                                                                |                                                     | ion                                                          |      |
| <i>Pdgf-B</i>                    | E17.5-18.5         |                                                                      |                                                                                | Lack of pericyte<br>Microvascular aneurysms         |                                                              | 2,23 |
| <i>Pdgf-R<math>\alpha</math></i> | Death at birth     |                                                                      |                                                                                |                                                     | Abnormal neural crest development<br>Abnormal somite pattern | 4    |
| <i>Pdgf-R<math>\beta</math></i>  | Death at birth     |                                                                      |                                                                                |                                                     | Hemorrhage, thrombocytopenia, anemia                         | 5    |
| <i>Edg-1</i>                     | E12.5-14.5         |                                                                      |                                                                                | Deficiency of vascular smooth muscle cells/pericyte |                                                              | 6    |
| <i>Edg-3</i>                     | Alive              |                                                                      |                                                                                |                                                     |                                                              | 7    |
| <i>Galpha13</i>                  | Intra-uterin death |                                                                      | Impaired ability of endothelial cell to develop into organized vascular system | Impaired fibroblast movement                        |                                                              | 8    |
| <i>Ang1</i>                      | E10.5              |                                                                      |                                                                                | Dilated vessel<br>Impaired vessel branching         |                                                              | 9    |
| <i>Ang2</i>                      | Alive              | Incomplete development of the superficial vascular bed of the retina | Absence of the intermediate and deep vascular bed of the retina                |                                                     | Lymphatic defect                                             | 0,31 |

|                             |                                             |                                                      |  |                                                         |                                                                                                                    |      |
|-----------------------------|---------------------------------------------|------------------------------------------------------|--|---------------------------------------------------------|--------------------------------------------------------------------------------------------------------------------|------|
| <i>Tie-1</i>                | E13.5-14.5<br>Death immediately after birth |                                                      |  | Leaky vessels, Edema<br>Leaky vessels, Small heart      | unexpanded alveoli                                                                                                 | 2,33 |
| <i>Tie-2</i>                | E10.5                                       |                                                      |  | Dilated vessels<br>Impaired vessel branching            |                                                                                                                    | 3    |
| <i>Tgf-β1</i>               | Alive or E10.5                              | Deficient extraembryonic hematopoiesis               |  | Poor EC differentiation and hematopoiesis               |                                                                                                                    | 4    |
| <i>Tgf-βRII</i>             | E10.5                                       | Defects in yolk sac hematopoiesis and vasculogenesis |  |                                                         |                                                                                                                    | 5    |
| <i>Alk1</i>                 | E11.5                                       |                                                      |  | Severe arteriovenous malformation                       |                                                                                                                    | 6,37 |
| <i>Alk5</i>                 | E10.5-11.5                                  |                                                      |  | Severe defects in vascular development                  | Absence of circulating red blood cell                                                                              | 8    |
| <i>Endoglin (Tgf-βRIII)</i> | E11.5                                       |                                                      |  | Poor vascular SMC development<br>Arrested EC remodeling |                                                                                                                    | 9    |
| <i>Smad2</i>                | Perigastrulation lethality                  |                                                      |  |                                                         | Defective in extraembryonic and mesoderm induction/formation<br>Abnormalities in anterior-posterior axis formation | 0-42 |
| <i>Smad3</i>                | 1-10 months after birth                     |                                                      |  |                                                         | Accelerate wound healing                                                                                           | 3-45 |

|                           |         |  |                        |                            |                                                                   |      |
|---------------------------|---------|--|------------------------|----------------------------|-------------------------------------------------------------------|------|
| <i>Smad5</i>              | E9-11.5 |  | Defect of angiogenesis | Mesenchymal apoptosis      | gut heart and craniofacial defect                                 | 6,47 |
| <i>Fgf-2</i>              | Alive   |  |                        | Delayed skin wound healing | Abnormal cortical neurogenesis                                    | 8,49 |
| <i>Syk/Slp-76 pathway</i> | Alive   |  |                        |                            | Failure to separate emerging lymphatic vessels from blood vessels | 0    |

### Molecules governing cell-cell interaction

| Gene               | Survival        | Phenotype      |              |                                                                                               |                                                  | ef.  |
|--------------------|-----------------|----------------|--------------|-----------------------------------------------------------------------------------------------|--------------------------------------------------|------|
|                    |                 | Vasculogenesis | Angiogenesis | Vessel maturation                                                                             | Other                                            |      |
| <i>Ve-cadherin</i> | E9.5            |                |              | Impaired vascular remodeling and maturation                                                   |                                                  | 1,52 |
| <i>Cx37/40</i>     | Perinatal death |                |              | Vessel dilatation and congestion especially in skin, testis, gastrointestinal tissue and lung |                                                  | 3    |
| <i>Cx40</i>        | Alive           |                |              |                                                                                               | Lower atrial and ventricular conduction velocity | 4    |
| <i>Cx43</i>        | Death at birth  |                |              | Right ventricular outflow tract obstruction                                                   |                                                  | 5    |
| <i>Cd31</i>        | Alive           |                |              |                                                                                               |                                                  | 6    |

| Gene         | Survival | Phenotype      |              |                                                                                                                                               |       | ef. |
|--------------|----------|----------------|--------------|-----------------------------------------------------------------------------------------------------------------------------------------------|-------|-----|
|              |          | Vasculogenesis | Angiogenesis | Vessel maturation                                                                                                                             | Other |     |
| <i>Cd148</i> | E11.5    |                |              | Enlarged primitive vessels defective in vascular remodeling and branching with impaired pericyte investment adjacent to endothelial structure |       | 7   |

### Molecules cell-matrix interaction

| Gene                          | Survival     | Phenotype      |              |                                                                            |                                                                                                                            | ef.  |
|-------------------------------|--------------|----------------|--------------|----------------------------------------------------------------------------|----------------------------------------------------------------------------------------------------------------------------|------|
|                               |              | Vasculogenesis | Angiogenesis | Vessel maturation                                                          | Other                                                                                                                      |      |
| $\alpha\beta_3$               | Alive        |                |              |                                                                            | Defects in platelet aggregation and clot retraction, prolonged bleeding times, and cutaneous and gastrointestinal bleeding | 8    |
| $\alpha\beta_5$               | Alive        |                |              |                                                                            |                                                                                                                            | 9    |
| $\beta_8$<br><i>integrins</i> | midgestation |                |              | Distended and leaky capillary vessels and aberrant brain capillary pattern |                                                                                                                            | 0    |
| <i>Mmp-2</i>                  | Alive        |                |              |                                                                            |                                                                                                                            | 1    |
| <i>Mmp-3</i>                  | Alive        |                |              |                                                                            |                                                                                                                            | 2    |
| <i>Pai-1</i>                  | Alive        |                |              |                                                                            |                                                                                                                            | 3,64 |
| <i>Tsp-1</i>                  | Alive        |                |              |                                                                            | Impaired pulmonary homeostasis                                                                                             | 5    |

| Gene                  | Survival | Phenotype      |              |                            |                        | ef. |
|-----------------------|----------|----------------|--------------|----------------------------|------------------------|-----|
|                       |          | Vasculogenesis | Angiogenesis | Vessel maturation          | Other                  |     |
| <i>Tsp-2</i>          | Alive    |                |              | Increased vascular density | Abnormal bleeding time | 6   |
| <i>uPa</i>            | Alive    |                |              |                            |                        | 7   |
| <i>Collagen XVIII</i> | Alive    |                |              |                            | Eye abnormality        | 8   |

## Transcription Factors

| Gene                               | Survival                | Phenotype                                 |              |                                                                                                                |                                                                                             | ef.  |
|------------------------------------|-------------------------|-------------------------------------------|--------------|----------------------------------------------------------------------------------------------------------------|---------------------------------------------------------------------------------------------|------|
|                                    |                         | Vasculogenesis                            | Angiogenesis | Vessel maturation                                                                                              | Other                                                                                       |      |
| <i>Hey2</i><br>( <i>glidlock</i> ) | Immediately after birth |                                           |              | Cardiac hypertrophy                                                                                            |                                                                                             | 9    |
| <i>Bmx</i>                         | Alive                   |                                           |              |                                                                                                                |                                                                                             | 0    |
| <i>Hif1<math>\alpha</math></i>     | E11                     | Complete lack of cephalic vascularization |              | Cardiovascular malformation                                                                                    | Neural tube defect<br>Reduction in the number of somites and abnormal neural fold formation | 1,72 |
| <i>Id1/3</i>                       | E10.5                   |                                           |              | Vascular malformation in the forebrain<br>Absence of branching and sprouting of vessels into the neuroectoderm |                                                                                             | 3    |
| <i>c-Myc</i>                       | E10.5                   | Profound defect of vasculogenesis         |              |                                                                                                                | Defect of primitive erythropoiesis                                                          | 4    |
| <i>Prox1</i>                       | Alive                   |                                           |              |                                                                                                                | Budding and sprouting arrest and lymphatics defect                                          | 5    |
