# Supplementary material for: Molecular regulation of vessel maturation
Source: Springer Nature journal article supplement (doi:10.1038/nm0603-685), 2003-05-30
Supplement: 41591_2003_BFnm0603685_MOESM2_ESM.pdf [file 41591_2003_BFnm0603685_MOESM2_ESM.pdf]

**SUPPLEMENTARY TABLE 2: STRATEGIES FOR VESSEL MATURATION**

|                      |                                                                                                                      |
|----------------------|----------------------------------------------------------------------------------------------------------------------|
| MOLECULAR STRATEGIES | Controlled -release of a cocktail of growth factors (e.g., VEGF with PDGFB/Ang1, as proteins or via gene transfer)   |
|                      | Controlled -release of a transcription factor (e.g., HIF1 $\alpha$ ) that regulates multiple vascular growth factors |
| CELLULAR STRATEGIES  | Implantation of ECs harboring anti-apoptotic (e.g., <i>Bcl2</i> ) or anti-senescence genes (e.g., <i>hTERT</i> )     |
|                      | Implantation of both ECs and MCs derived/expanded from embryonic or adult stem cells                                 |
|                      | Mobilization of both ECs and MCs to the site of angiogenesis by injecting a common attractant/mitogen (e.g., PlGF ?) |
